# Supplementary material for: Copper Chalcogenide–Copper Tetrahedrite Composites—A New Concept for Stable Thermoelectric Materials Based on the Chalcogenide System
Source: MDPI journal article supplement (doi:10.3390/ma14102635), 2021-05-18
Supplement: s1 [file s1]

# Copper Chalcogenide–Copper Tetrahedrite Composites—A New Concept for Stable Thermoelectric Materials Based on the Chalcogenide System

Andrzej Mikuła \*, Krzysztof Mars, Paweł Nieroda and Paweł Rutkowski

Faculty of Materials Science and Ceramics, AGH University of Science and Technology, Al. Mickiewicza 30, 30-059 Krakow, Poland; kmars@agh.edu.pl (K.M.); pnieroda@agh.edu.pl (P.N.); pawelr@agh.edu.pl (P.R.)

\* Correspondence: amikula@agh.edu.pl

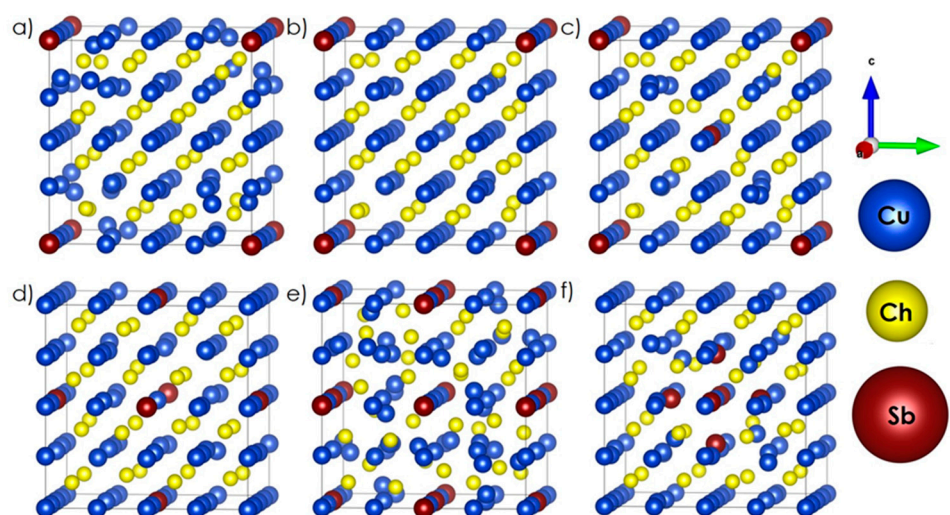

**Figure S1.** Optimized model structures: (a) Cu<sub>1.97</sub>Sb<sub>0.03</sub>Ch, (b) Cu<sub>1.94</sub>Sb<sub>0.03</sub>Ch, (c) Cu<sub>1.94</sub>Sb<sub>0.06</sub>Ch, (d) Cu<sub>1.85</sub>Sb<sub>0.05</sub>Ch, (e) Cu<sub>1.81</sub>Sb<sub>0.19</sub>Ch\_v1, (f) Cu<sub>1.81</sub>Sb<sub>0.19</sub>Ch\_v2.

**Citation:** Mikuła, A.; Mars, K.; Nieroda, P.; Rutkowski, P. Copper Chalcogenide–Copper Tetrahedrite Composites—A New Concept for Stable Thermoelectric Materials Based on Chalcogenide System. *Materials* **2021**, *14*, 2635. <https://doi.org/10.3390/ma14102635>

Academic Editor: Victor M. Prida

Received: 13 April 2021

Accepted: 14 May 2021

Published: 18 May 2021

**Publisher's Note:** MDPI stays neutral with regard to jurisdictional claims in published maps and institutional affiliations.

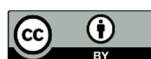

**Copyright:** © 2021 by the authors. Submitted for possible open access publication under the terms and conditions of the Creative Commons Attribution (CC BY) license (<http://creativecommons.org/licenses/by/4.0/>).
